# Supplementary material for: Effect of TGF-β1 on the Migration and Recruitment of Mesenchymal Stem Cells after Vascular Balloon Injury: Involvement of Matrix Metalloproteinase-14
Source: PubMed Central journal article supplement (PMC4754777; doi:10.1038/srep21176), 2016-02-16

# **Effect of TGF- $\beta$ 1 on the Migration and Recruitment of Mesenchymal Stem Cells after Vascular Balloon Injury: Involvement of Matrix Metalloproteinase-14**

Wei Zhao<sup>#1</sup>, Chengyan Wang<sup>#1</sup>, Ruixue Liu<sup>1</sup>, Cuilei Wei<sup>1</sup>, Juncang Duan<sup>2</sup>, Kejian Liu<sup>2</sup>, Shugang Li<sup>3</sup>, Hong Zou<sup>1</sup>, Jin Zhao<sup>1</sup>, Lianghai Wang<sup>1</sup>, Yan Qi<sup>1</sup>, Weihua Liang<sup>1</sup>, Jinfang Jiang<sup>1</sup>, Wenjie Zhang<sup>1</sup>, Lijuan Pang<sup>\*1</sup>, Feng Li<sup>\*1</sup>

<sup>1</sup>Department of Pathology and Key Laboratory of Xinjiang Endemic and Ethnic Diseases (Ministry of Education), Shihezi University School of Medicine, 59 North 2nd Road, Shihezi, Xinjiang 832002, China

<sup>2</sup>Department of Cardiology, the First Affiliated Hospital of Shihezi city, 45 North 3rd Road, Shihezi, Xinjiang 832002, China

<sup>3</sup>Department of Public Health, Shihezi University School of Medicine, 59 North 2nd Road, Shihezi, Xinjiang 832002, China

#Co-first authors:

**Wei Zhao**, E-mail: 18599046455@163.com

**Chengyan Wang**, E-mail: 513935508@qq.com

Both authors contributed equally to this work

\*Corresponding authors:

**Lijuan Pang**, MD, PhD E-mail: ocean123456@163.com

**Feng Li**, MD, PhD E-mail: lifeng7855@126.com Fax: +86-0993-205-713

### **Supplement Figure Legends**

#### **Supplement Figure 1. Immunohistochemical analysis of Ki-67, CD31, and CD34 expression in injured arteries.**

A–C: Representative images of Ki-67(A), CD31 (B), and CD34 (C) expression. Scale bar, 50  $\mu$ m.

#### **Supplement Figure 2. Immunohistochemical analysis of Calponin, SMA, and Vimentin expression in injured arteries.**

A. C: Representative images of Calponin (A), SMA (B), and Vimentin (C). Scale bar, 50  $\mu$ m.

#### **Supplement Figure 3. MMP-14 expression after arterial injury.**

Representative images of MMP-14 expression in injured arteries, as detected by immunohistochemistry. Scale bar, 50  $\mu$ m.

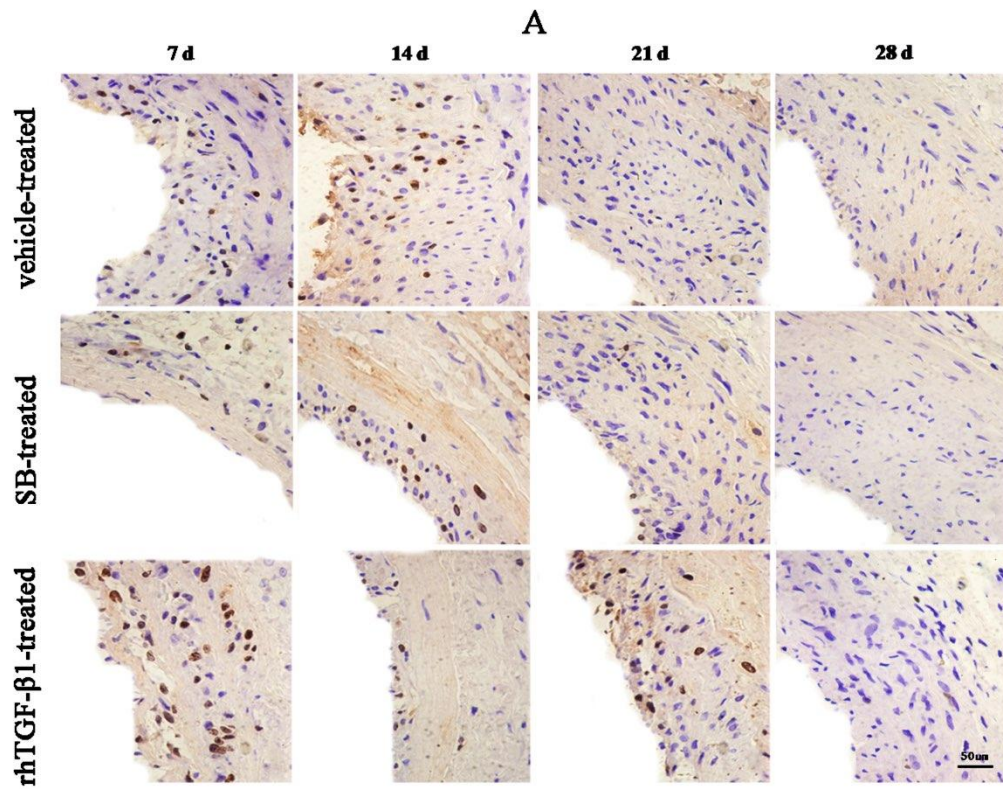

Supplement Fig. 1A (Ki-67)

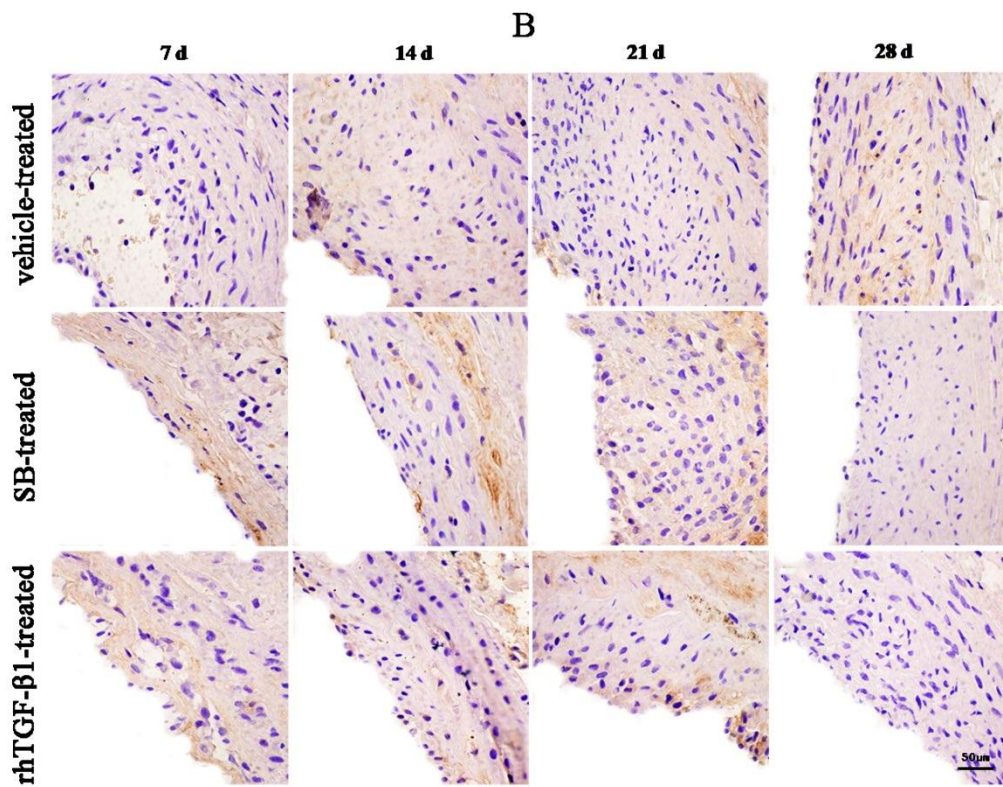

Supplement Fig. 1B (CD31)



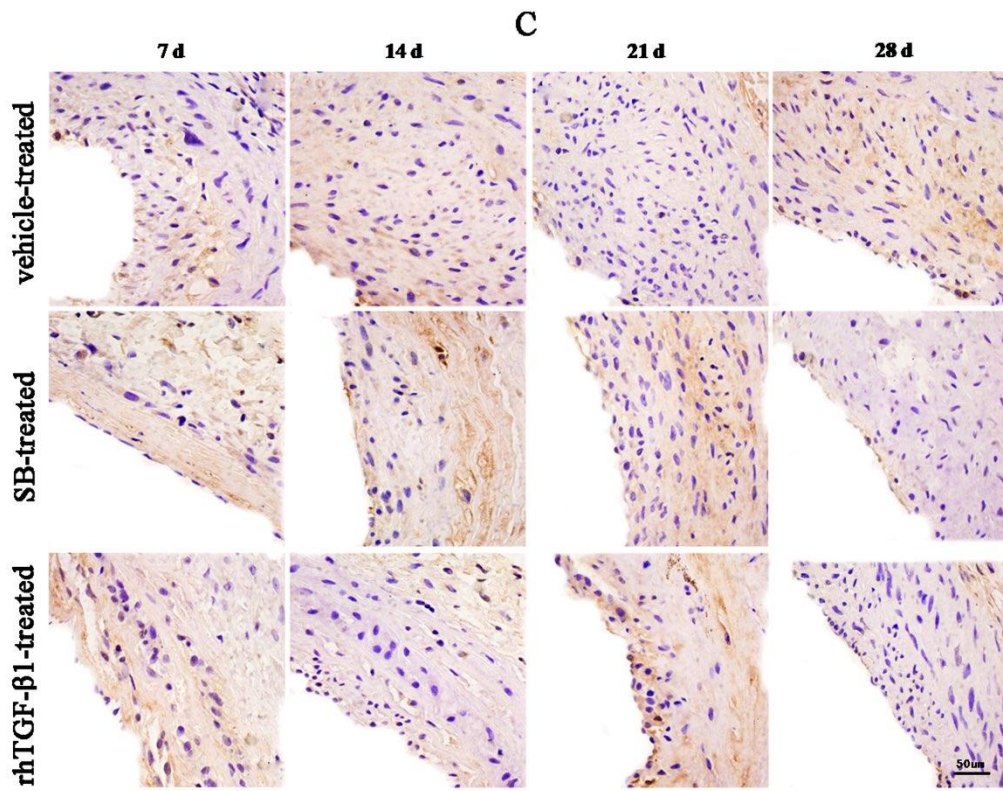

Supplement Fig. 1C (CD34)

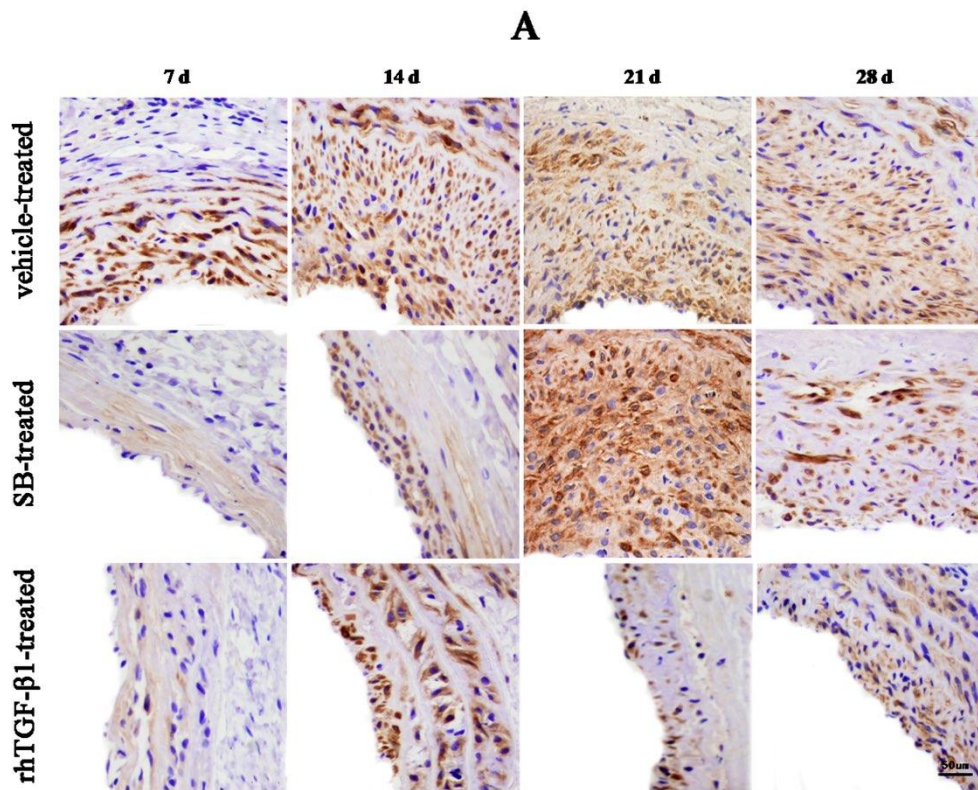

Supplement Fig. 2A (Calponin)



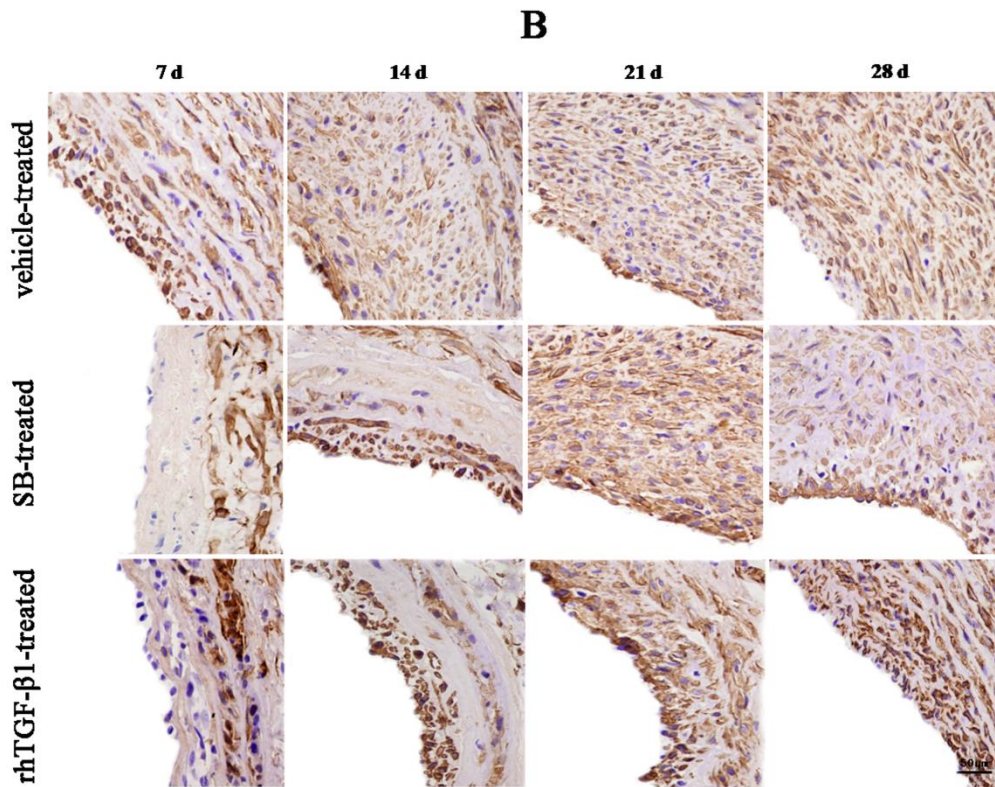

Supplement Fig. 2B (SMA)

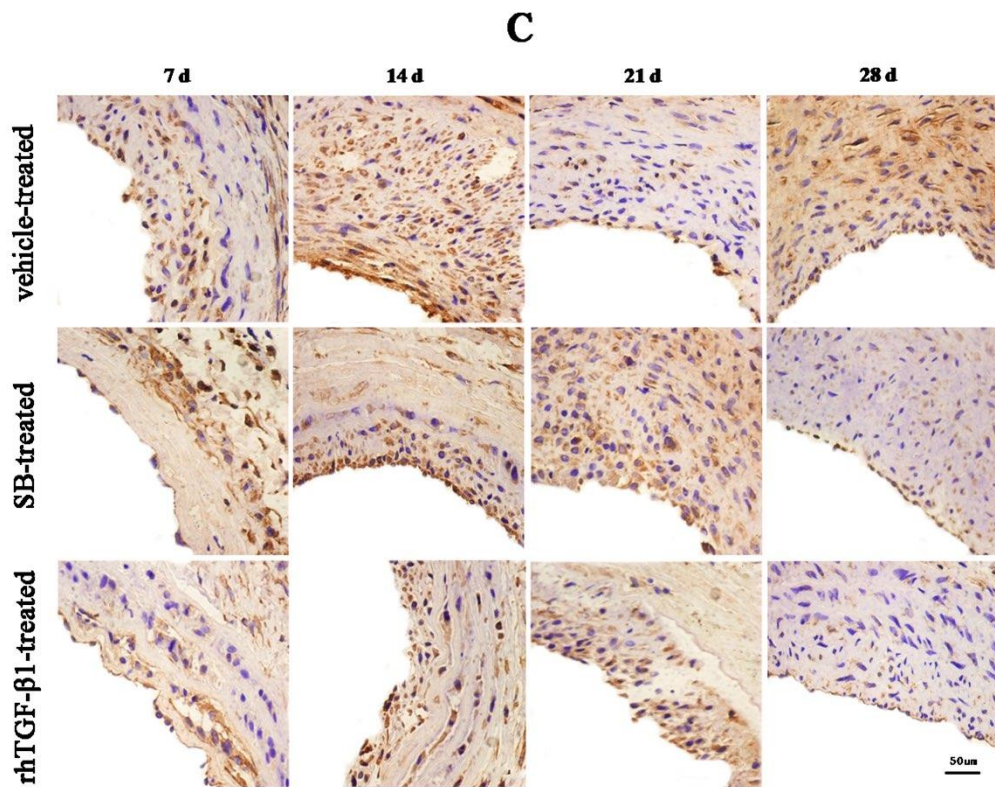

Supplement Fig. 2C (Vimentin)

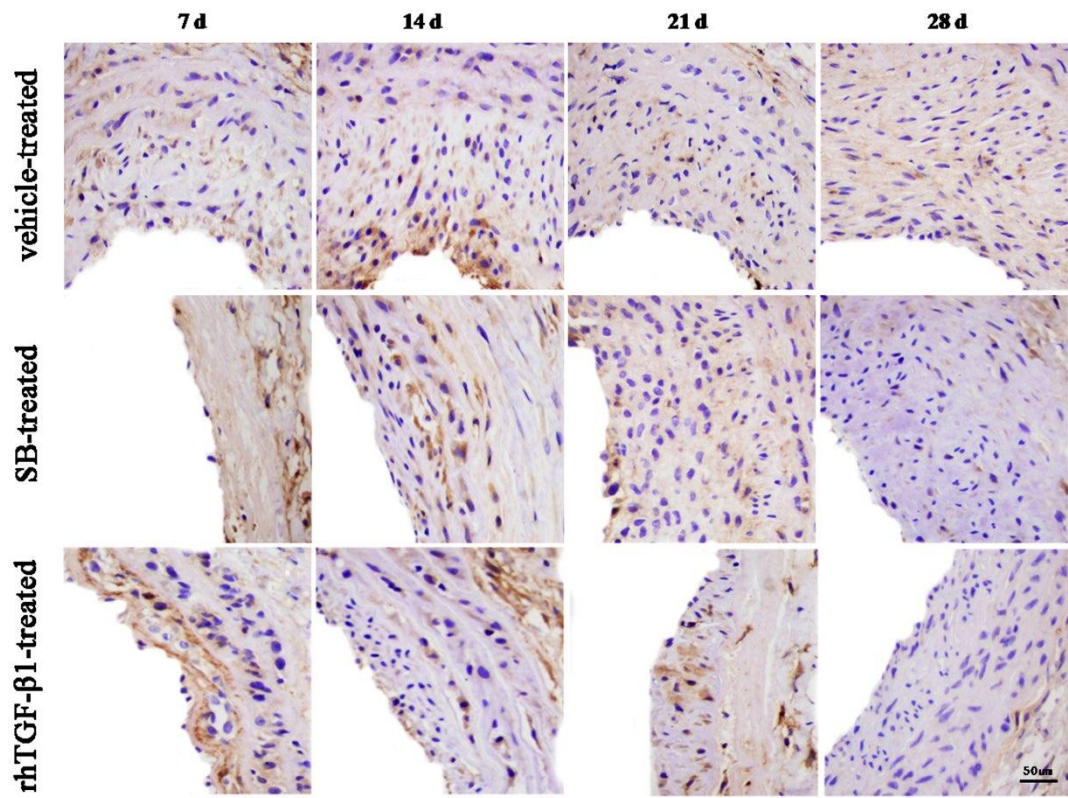

Supplement Fig. 3 (MMP-14)

**Figure 2A**

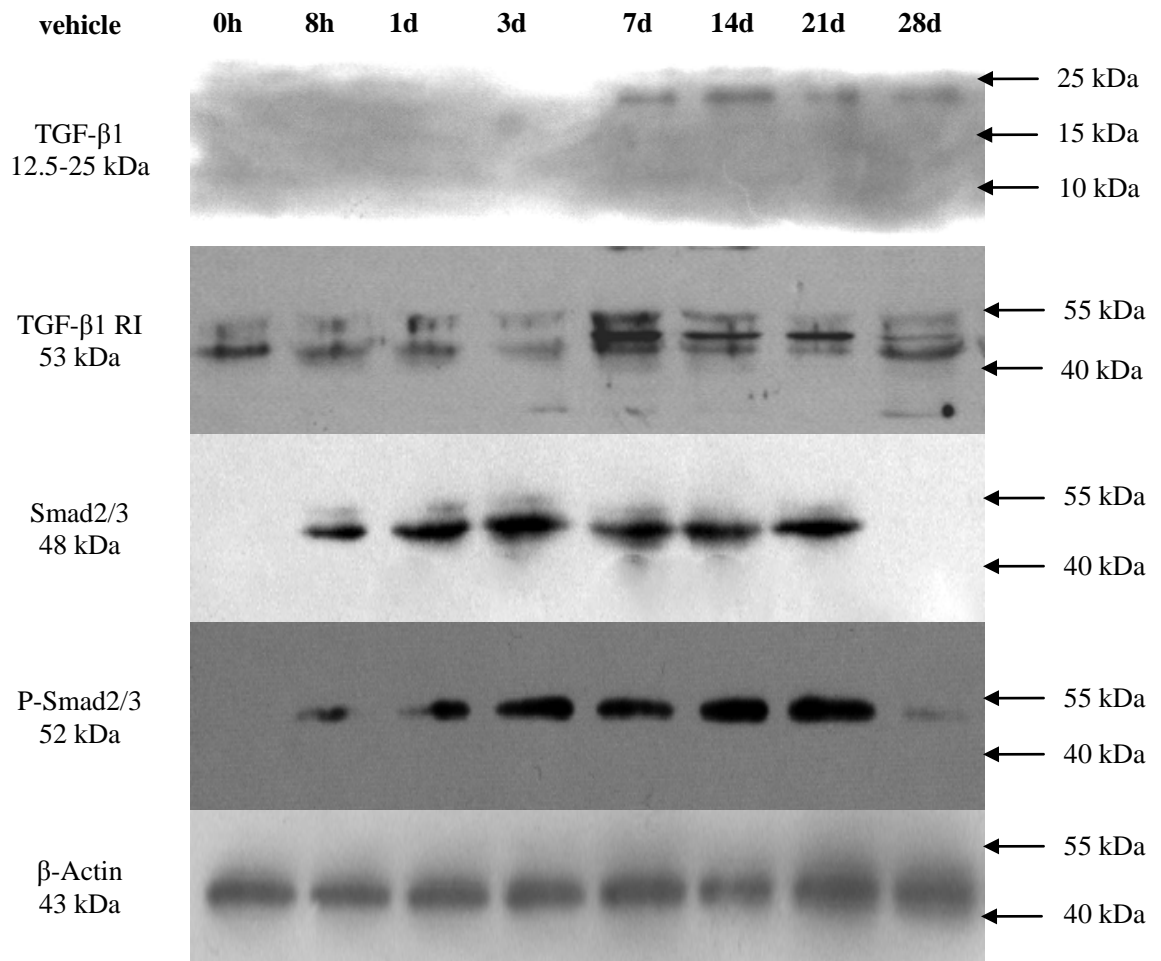

**Figure 2B**

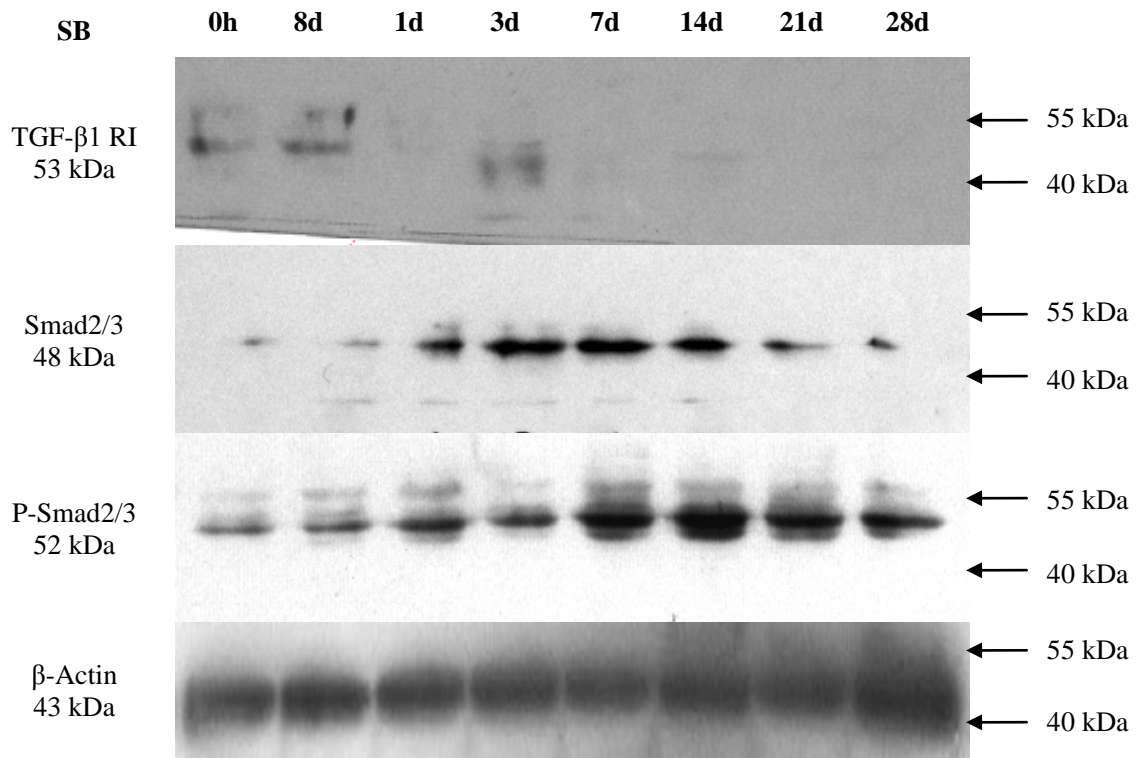



**Figure 2C**

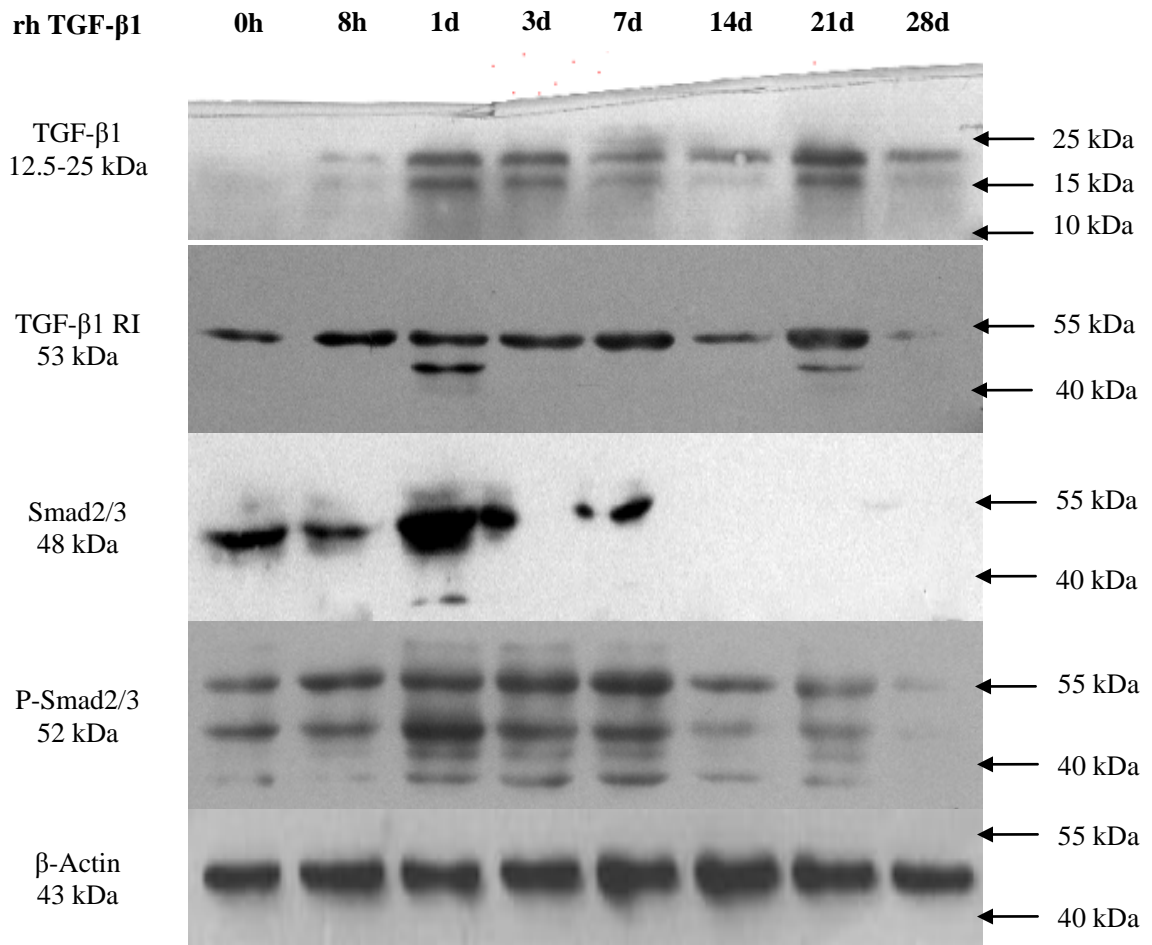

**Figure 5**

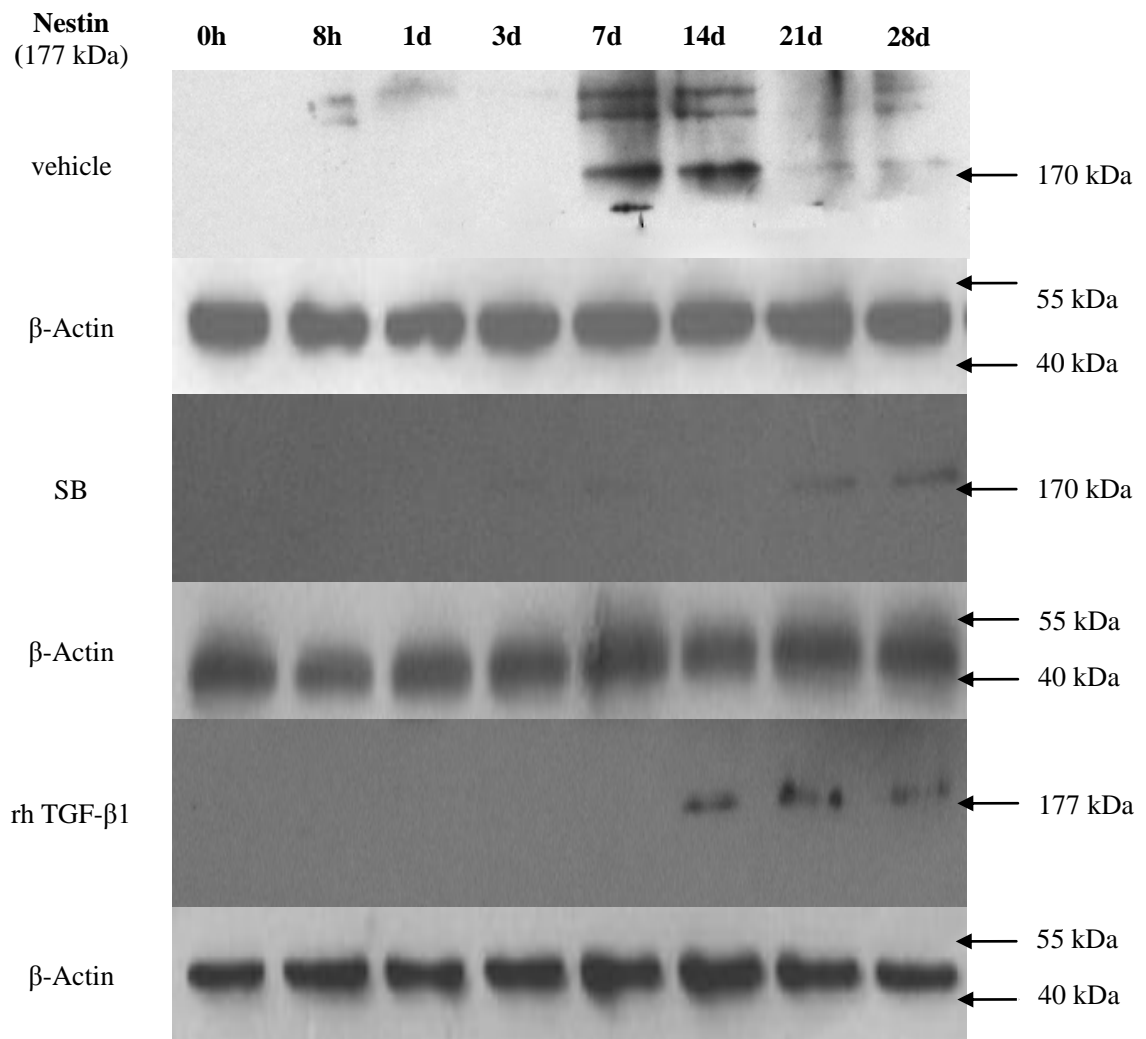

**Figure 6A**

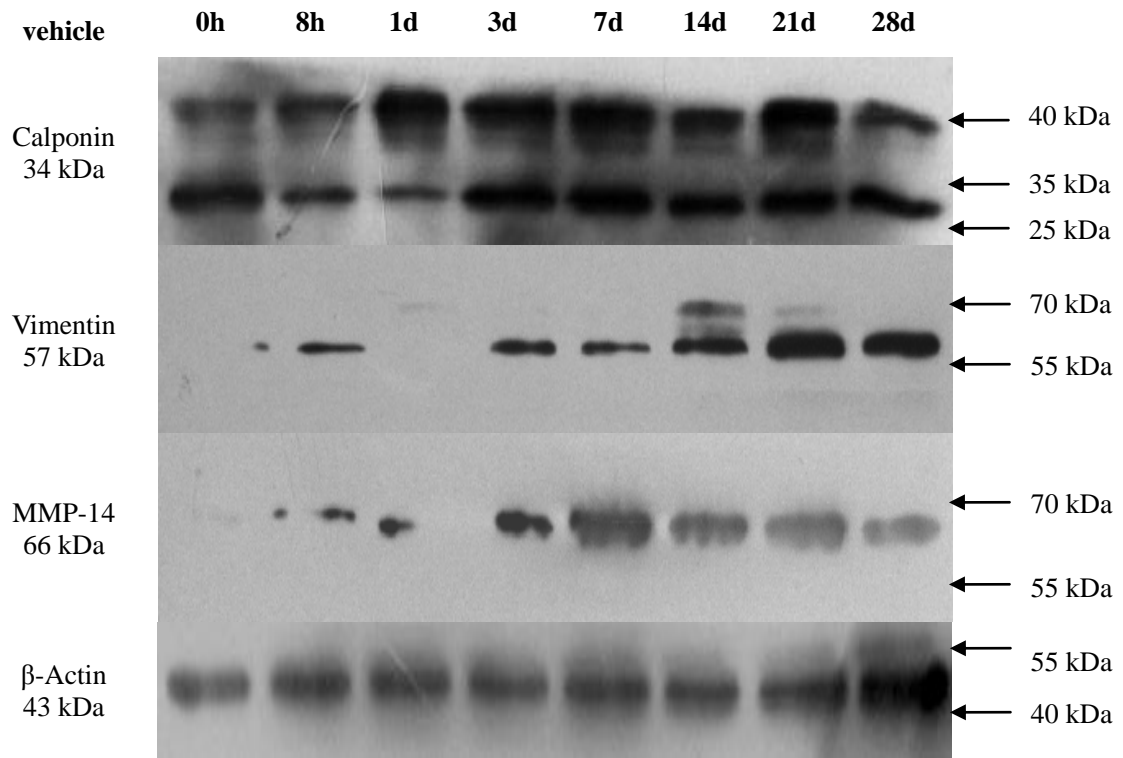



**Figure 6B**

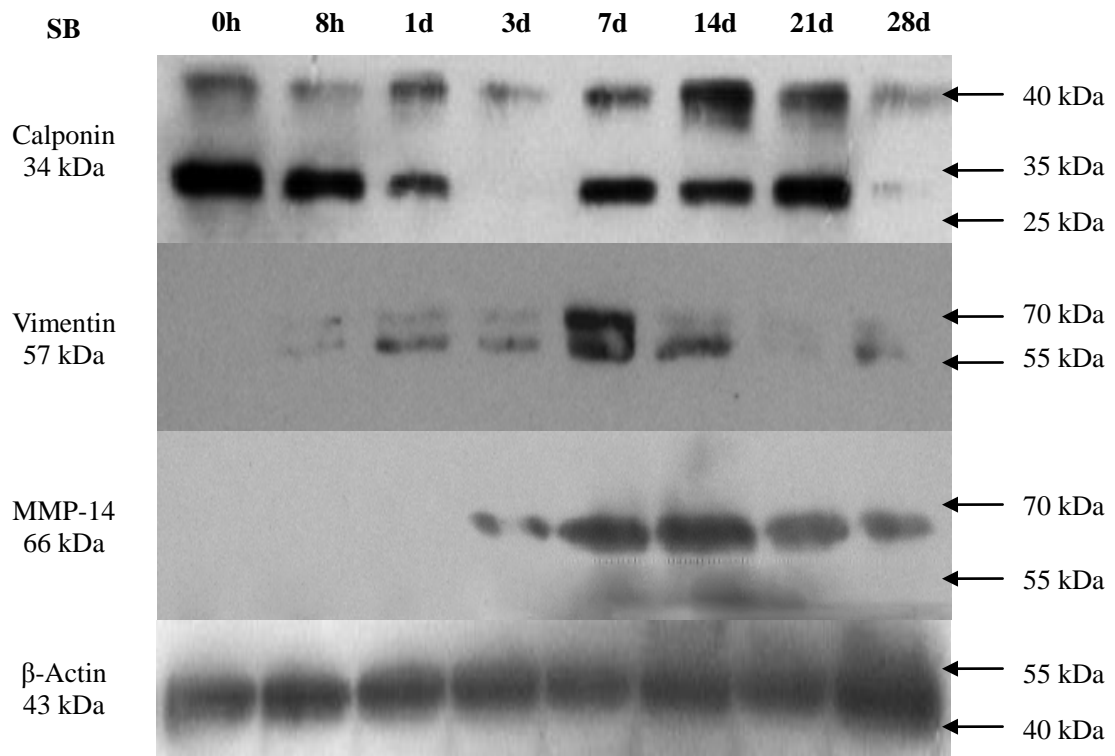

**Figure 6C**

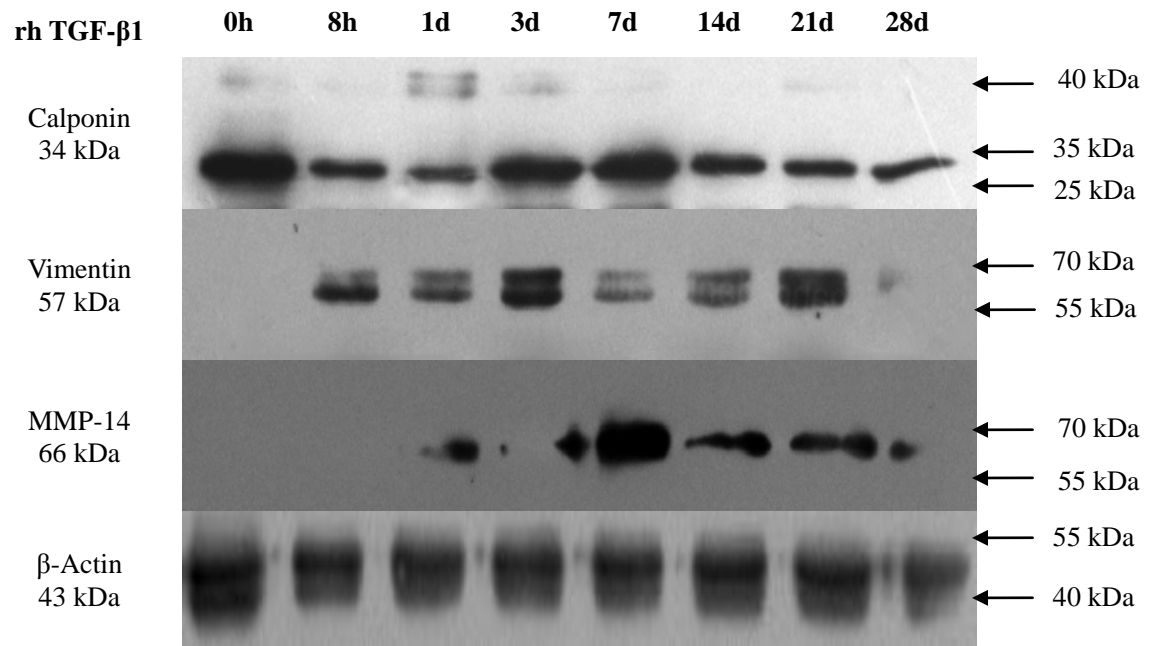

Supplement: srep21176-s1.pdf [file srep21176-s1.pdf]
